# Supplementary material
Source: publisher figshare collection journal article supplement (https://diabetesjournals.figshare.com/articles/dataset/_/14666160)
Supplement: Supplementary file 2 [file 1]

# Checklist for Reporting Human Islet Preparations Used in Research

Adapted from Hart NJ, Powers AC (2018) Progress, challenges, and suggestions for using human islets to understand islet biology and human diabetes. *Diabetes* 67:1000-1010.

Selected Islet Preparations for Alvin C. Powers

Report Downloaded on 4/29/2021 8:26:44 AM

Data provided by IIDP

Labels in blue text are additional fields or clarification provided by IIDP

Manuscript DOI: <https://doi.org/10.2337/DB21-0037>

**Title** Mitochondrial efflux of citrate and isocitrate is fully dispensable for glucose-stimulated insulin secretion and pancreatic islet function  
**Author list** Casey J. Bauchle et al  
**Corresponding author** Samuel B. Stephens  
**Email address** samuel-b-stephens@uiowa.edu

| Islet Preparation                                                                                                                                      | 1                                       | 2                                        | 3                                        |    |
|--------------------------------------------------------------------------------------------------------------------------------------------------------|-----------------------------------------|------------------------------------------|------------------------------------------|----|
| <b>MANDATORY INFORMATION</b>                                                                                                                           |                                         |                                          |                                          |    |
| Unique identifier                                                                                                                                      | SAMN10372788                            | SAMN11155033                             | SAMN12123358                             |    |
| Donor Age (years)                                                                                                                                      |                                         | 50                                       | 51                                       | 66 |
| Donor Sex (M/F)                                                                                                                                        | F                                       | M                                        | F                                        |    |
| Donor BMI (kg/m <sup>2</sup> )                                                                                                                         | 35.4                                    | 24.0                                     | 29.1                                     |    |
| Donor HbA1c                                                                                                                                            | 9.9                                     | 4.7                                      | 7.2                                      |    |
| Origin/source of islets                                                                                                                                | IIDP                                    | IIDP                                     | IIDP                                     |    |
| Islet isolation center <sup>a</sup>                                                                                                                    | Southern California Islet Cell Resource | Southern California Islet Cell Resource  | The Scharp-Lacy Research Institute       |    |
| Donor history of diabetes? Yes/No                                                                                                                      | T2D                                     | No                                       | T2D                                      |    |
| <b>If Yes, complete the next two lines if this information is available</b>                                                                            |                                         |                                          |                                          |    |
| Diabetes duration (years)                                                                                                                              | >10 years                               | Not Applicable                           | 6-10 years                               |    |
| Glucose-lowering therapy at time of culture                                                                                                            | Oral Medicine                           | Not Applicable                           | Oral Medicine: Metformin                 |    |
| <b>RECOMMENDED INFORMATION</b>                                                                                                                         |                                         |                                          |                                          |    |
| Cause of death                                                                                                                                         | Cerebrovascular/stroke                  | Head trauma                              | Cerebrovascular/stroke                   |    |
| Warm ischemia time (h)                                                                                                                                 | Not Reported                            | Not Reported                             | Not Reported                             |    |
| Cold ischemia time (h)                                                                                                                                 | 8.6                                     | 8.8                                      | 7.9                                      |    |
| Estimated purity (%)                                                                                                                                   |                                         |                                          |                                          |    |
| By islet isolation center at time of shipment with Dithizone (DTZ) staining per IIDP SOP                                                               | 80                                      | 80                                       | 85                                       |    |
| Estimated viability (%)                                                                                                                                |                                         |                                          |                                          |    |
| By islet isolation center at time of broadcast with Fluorescence Diacetate/Propidium Iodide (FDA/PI) staining per IIDP SOP                             | 96                                      | 95                                       | 95                                       |    |
| Total culture time(h) <sup>c</sup>                                                                                                                     |                                         |                                          |                                          |    |
| Calculate[start date/time of experiment]-[date/ time islet culture began (below)]                                                                      | To be completed by investigator         | To be completed by investigator          | To be completed by investigator          |    |
| Date/Time Islet Culture Began at islet isolation center (Pacific Standard Time, 24-hour format)                                                        | 2018-11-03 16:20                        | 2019-03-15 13:40                         | 2019-06-20 17:00                         |    |
| Glucose-stimulated insulin secretion or other functional measurement <sup>d</sup>                                                                      |                                         |                                          |                                          |    |
| Stimulation Index (SI) by static incubation at islet isolation center pre-shipment per IIDP SOP                                                        | SI (G2.8mM-G28mM)= 1.1                  | SI (G2.8mM-G28mM)= 1.0                   | SI (G2.8mM-G28mM)= 1.8                   |    |
| Glucose-stimulated insulin secretion or other functional measurement Area Under the Curve (AUC) by perfusion at HIPP post shipment sample per HIPP SOP | AUC (G5.6mM-G16.7mM)= 9.7 (ng/100 IEQs) | AUC (G5.6mM-G16.7mM)= 21.5 (ng/100 IEQs) | AUC (G5.6mM-G16.7mM)= 21.5 (ng/100 IEQs) |    |
| Handpicked to purity? Yes/No                                                                                                                           | To be completed by investigator         | To be completed by investigator          | To be completed by investigator          |    |
| Additional notes                                                                                                                                       | To be completed by investigator         | To be completed by investigator          | To be completed by investigator          |    |

\*Shipments of more than one batch type were received from this islet isolation

<sup>a</sup>For example, IIDP, ECIT, Alberta IsletCore

<sup>b</sup>Please specify the therapy/therapies

<sup>c</sup>Time of islet culture at the isolation centre, during shipment and at the receiving laboratory

<sup>d</sup>Please specify the test and the results

pancreatic islet  $\beta$ -cell function

| 4                                       | 5                                       | 6                                       | 7                                       |    |
|-----------------------------------------|-----------------------------------------|-----------------------------------------|-----------------------------------------|----|
| SAMN12129273                            | SAMN12597653                            | SAMN12634037                            | SAMN15894111                            |    |
|                                         | 30                                      | 42                                      | 63                                      | 58 |
| F                                       | F                                       | M                                       | F                                       |    |
| 35.7                                    | 40.3                                    | 31.7                                    | 26.8                                    |    |
| 4.5                                     | 9.5                                     | 5.9                                     |                                         |    |
| IIDP                                    | IIDP                                    | IIDP                                    | IIDP                                    |    |
| Southern California Islet Cell Resource |    |
| No                                      | T2D                                     | T2D                                     | No                                      |    |
| Not Applicable                          | >10 years                               | 6-10 years                              | Not Applicable                          |    |
| Not Applicable                          | Oral Medicine                           | Oral Medicine                           | Not Applicable                          |    |
| Anoxia                                  | Cerebrovascular/stroke                  | Cerebrovascular/stroke                  | Cerebrovascular/stroke                  |    |
| 0.2                                     | 0.3                                     | No                                      | No                                      |    |
| 10.6                                    | 11.2                                    | 10.9                                    | 9.2                                     |    |
| 90                                      | 80                                      | 85                                      | 90                                      |    |
| 96                                      | 96                                      | 95                                      | 95                                      |    |
| To be completed by investigator         |    |
| 2019-06-24 08:00                        | 2019-08-16 07:25                        | Not Reported                            | Not Reported                            |    |
| SI (G2.8mM-G28mM)= 1.8                  | SI (G2.8mM-G28mM)= 0.4                  | SI (G2.8mM-G28mM)= 5.0                  | SI (G2.8mM-G28mM)= 5.9                  |    |
| AUC (G5.6mM-G16.7mM)= 15.5 (ng/         | AUC (G5.6mM-G16.7mM)= 20.9 (ng/         | AUC (G5.6mM-G16.7mM)= Not Avail         | AUC (G5.6mM-G16.7mM)= Not Avail         |    |
| To be completed by investigator         |    |
| To be completed by investigator         |    |

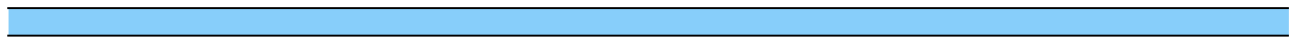

| 8                                       | 9                                       | 10                              | 11                                      |    |
|-----------------------------------------|-----------------------------------------|---------------------------------|-----------------------------------------|----|
| SAMN15944113                            | SAMN16365027                            | SAMN16452455                    | SAMN17831932                            |    |
|                                         | 42                                      | 62                              | 39                                      | 60 |
| F                                       | F                                       | M                               | M                                       |    |
| 23.5                                    | 28.5                                    | 31.1                            | 41.3                                    |    |
|                                         | 7.6                                     | 5.6                             | 7.5                                     |    |
|                                         | IIDP                                    | IIDP                            | IIDP                                    |    |
| Southern California Islet Cell Resource | Southern California Islet Cell Resource | University of Pennsylvania      | Southern California Islet Cell Resource |    |
| No                                      | T2D                                     | No                              | T2D                                     |    |
| Not Applicable                          | 0-5 years                               | Not Applicable                  | Unknown                                 |    |
| Not Applicable                          | Oral Medicine                           | Not Applicable                  | Oral Medicine                           |    |
| Cerebrovascular/stroke                  | Cerebrovascular/stroke                  | Anoxia                          | Cerebrovascular/stroke                  |    |
| No                                      | 0.1                                     | Not Reported                    | 0.3                                     |    |
| 11.3                                    | 7.0                                     | 7.9                             | 7.2                                     |    |
| 95                                      | 90                                      | 85                              | 80                                      |    |
| 95                                      | 96                                      | 92                              | 96                                      |    |
| To be completed by investigator         | To be completed by investigator         | To be completed by investigator | To be completed by investigator         |    |
| Not Reported                            | 2020-10-04 05:00                        | 2020-10-15 15:00                | 2021-02-06 05:30                        |    |
| SI (G2.8mM-G28mM)= 4.3                  | SI (G2.8mM-G28mM)= 6.6                  | SI (G2.8mM-G28mM)= 3.0          | SI (G2.8mM-G28mM)= 1.3                  |    |
| AUC (G5.6mM-G16.7mM)= Not Avail         | AUC (G5.6mM-G16.7mM)= 0.0 (ng/1         | AUC (G5.6mM-G16.7mM)= Not Avail | AUC (G5.6mM-G16.7mM)= 0.0 (ng/1         |    |
| To be completed by investigator         | To be completed by investigator         | To be completed by investigator | To be completed by investigator         |    |
| To be completed by investigator         | To be completed by investigator         | To be completed by investigator | To be completed by investigator         |    |

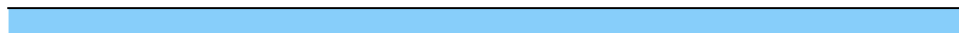

| 12                                      | 13                              | 14                              |    |
|-----------------------------------------|---------------------------------|---------------------------------|----|
| SAMN18200483                            | R276                            | SAMN18207297                    |    |
|                                         | 48                              | 54                              | 47 |
| F                                       | F                               | M                               |    |
| 47.6                                    | 24.4                            | 40.3                            |    |
| 5.4                                     | 7.2                             | 5.5                             |    |
| IIDP                                    | Alberta Diabetes Institute      | Alberta Diabetes Institute      |    |
| Southern California Islet Cell Resource | Islet Core                      | Islet Core                      |    |
| No                                      | T2D                             | No                              |    |
| Not Applicable                          | 10 yr                           | Not Applicable                  |    |
| Not Applicable                          | Insulin                         | Not Applicable                  |    |
| Cerebrovascular/stroke                  | Not Reported                    | Not Reported                    |    |
| Not Reported                            | Not Reported                    | Not Reported                    |    |
| 6.6                                     | 21                              | 6                               |    |
| 90                                      | 75                              | 90                              |    |
| 96                                      | Not Reported                    | Not Reported                    |    |
| To be completed by investigator         | To be completed by investigator | To be completed by investigator |    |
| 2021-03-06 22:25                        | Not Reported                    | Not Reported                    |    |
| SI (G2.8mM-G28mM)= 2.0                  | Not Reported                    | Not Reported                    |    |
| AUC (G5.6mM-G16.7mM)= 0.0 (ng/1         | Not Reported                    | Not Reported                    |    |
| To be completed by investigator         | To be completed by investigator | To be completed by investigator |    |
| To be completed by investigator         | To be completed by investigator | To be completed by investigator |    |
