# Supplementary material
Source: publisher figshare collection journal article supplement (https://diabetesjournals.figshare.com/articles/dataset/_/14666160)

**Figure S1**

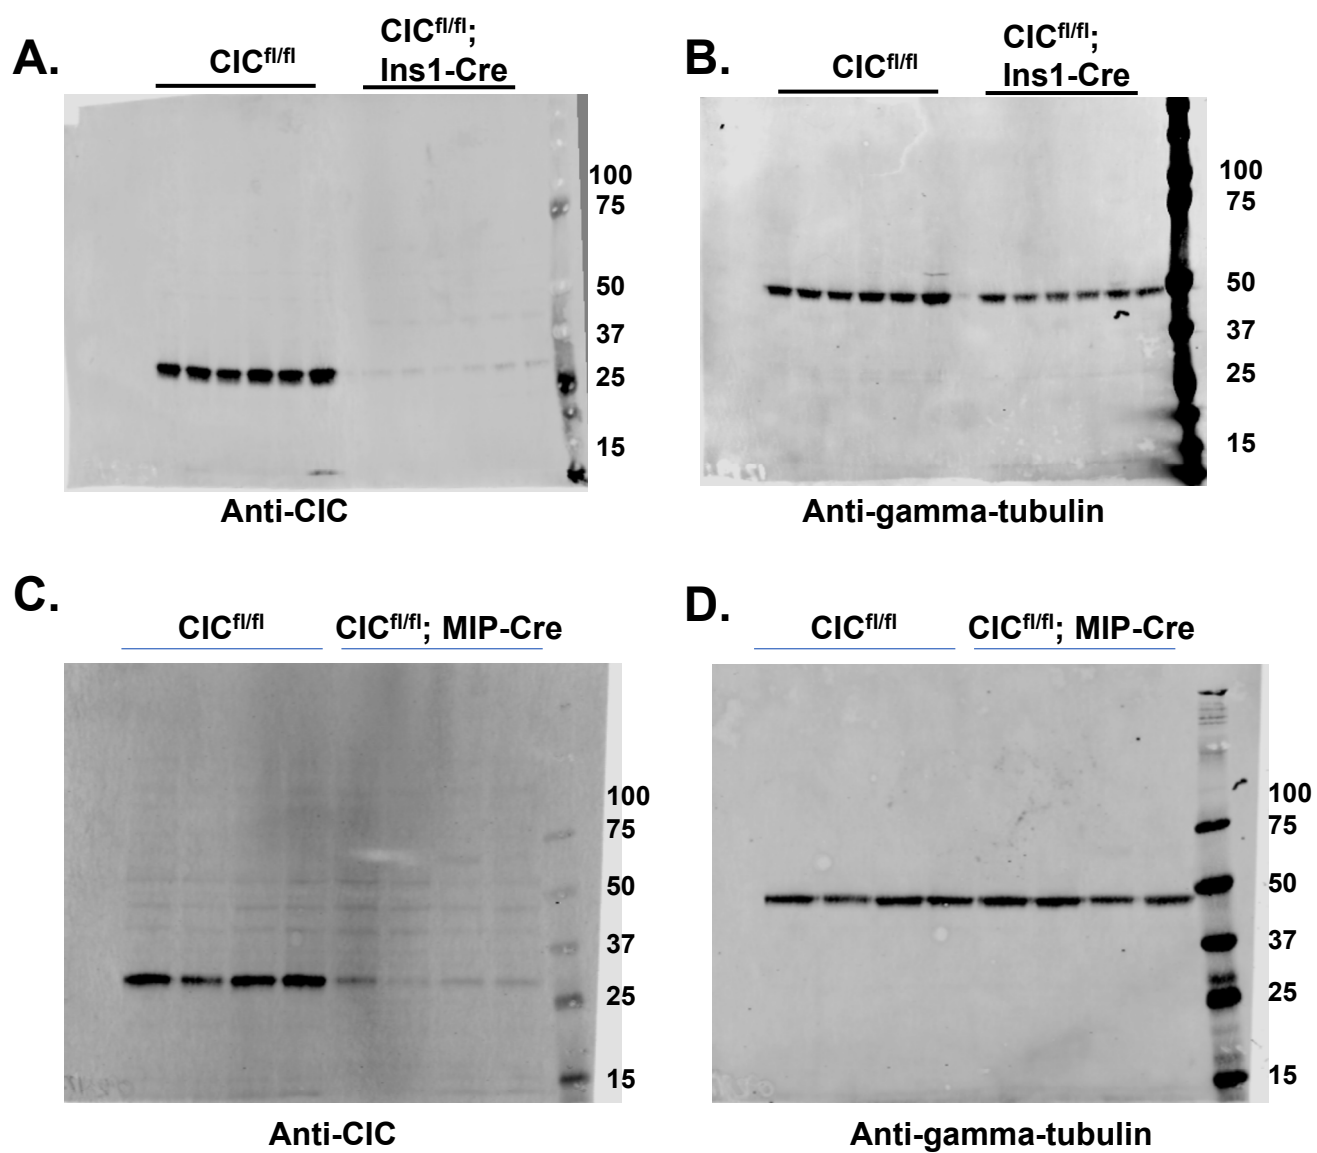

**Figure S2**

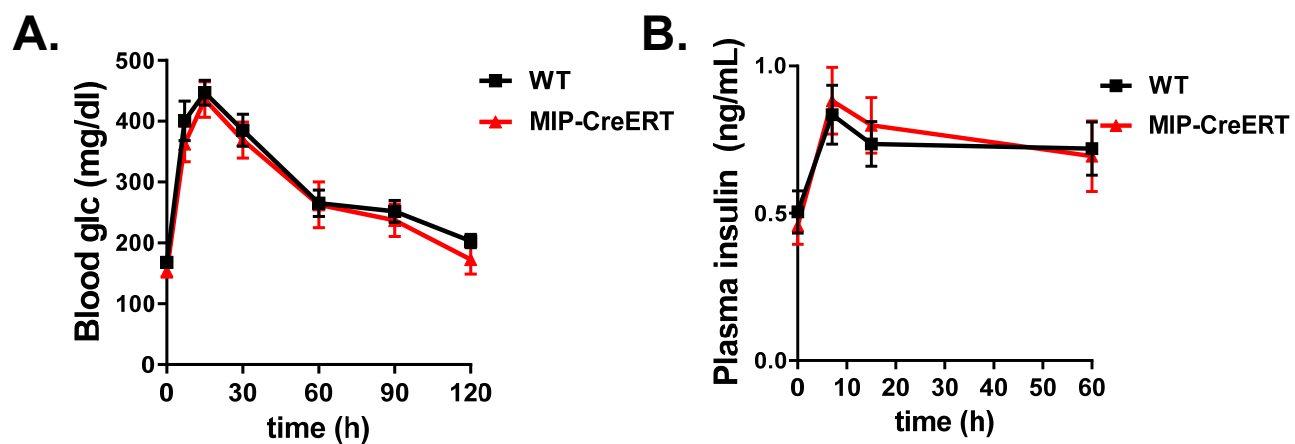

**Figure S3**

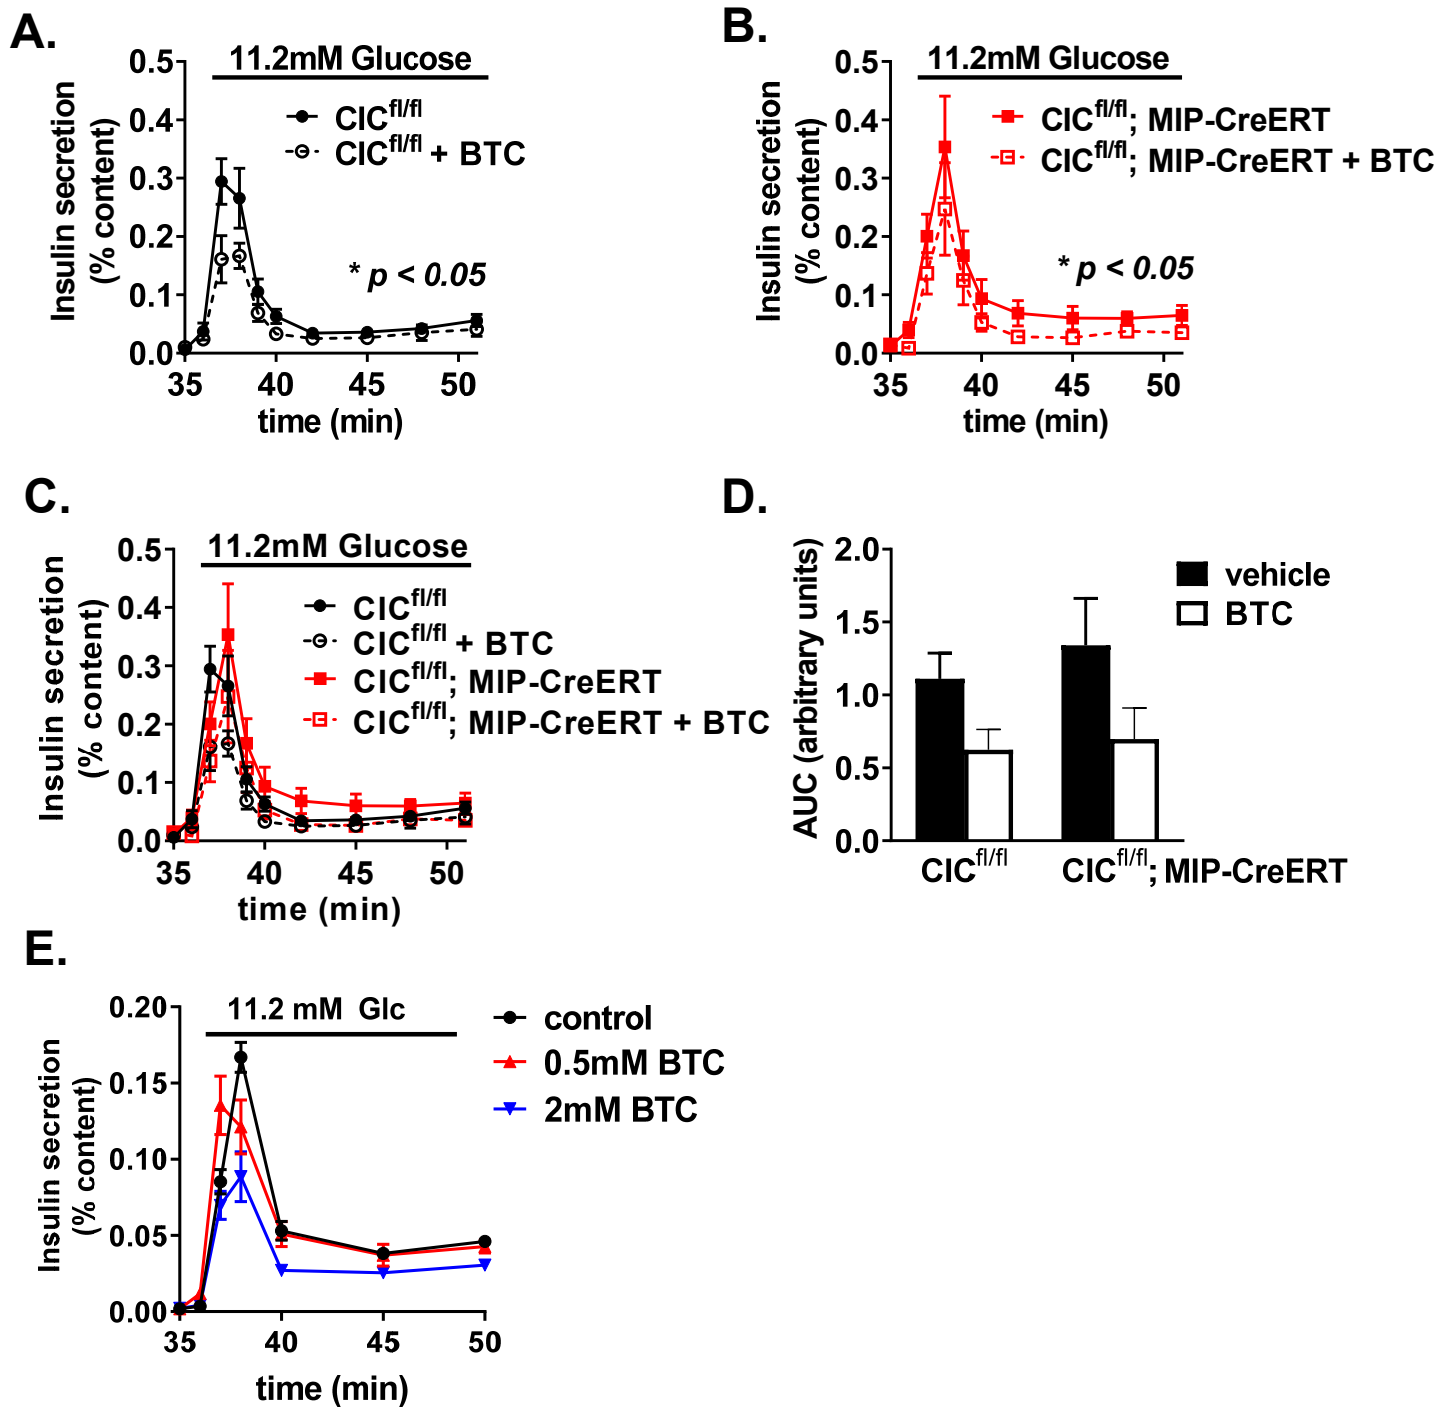

Supplement: Supplementary file 1 [file 1]
